# Supplementary material
Source: PubMed Central journal article supplement (PMC2694126)
Supplement: supp_91339.2008_legends.pdf [file supp_91339.2008_legends.pdf]

### Supplementary Figure Legends:

Supplementary Figure 1: Ten days following Dil application to the dura, mast cells appeared intact (A,B) and did not differ from those observed in a naïve animal (C,D). MMA = middle meningeal artery, Arrows = labeled mast cells. A,C and B,D represent low and high magnification images respectively. Scale bars = 20 $\mu$ M.

Supplementary Figure 2: Depolarization alone was able to increase dural afferent (n=9) excitability. DC current was used to depolarize dural afferents 10mV from their resting membrane potential (A). Depolarization alone was able to increase the excitability of dural afferents as manifest by a decrease in rheobase (B), a hyperpolarization of AP threshold (C) and a left shift in the stimulus response function. Inset: dural afferents had a significantly steeper slope following depolarization. Slope plotted as median 5<sup>th</sup>/95<sup>th</sup> percentile. \* Indicates significant differences where  $p < 0.05$ , paired t-test.
