# Supplementary material
Source: PubMed Central journal article supplement (PMC2694126)

# Supplementary Figure 1

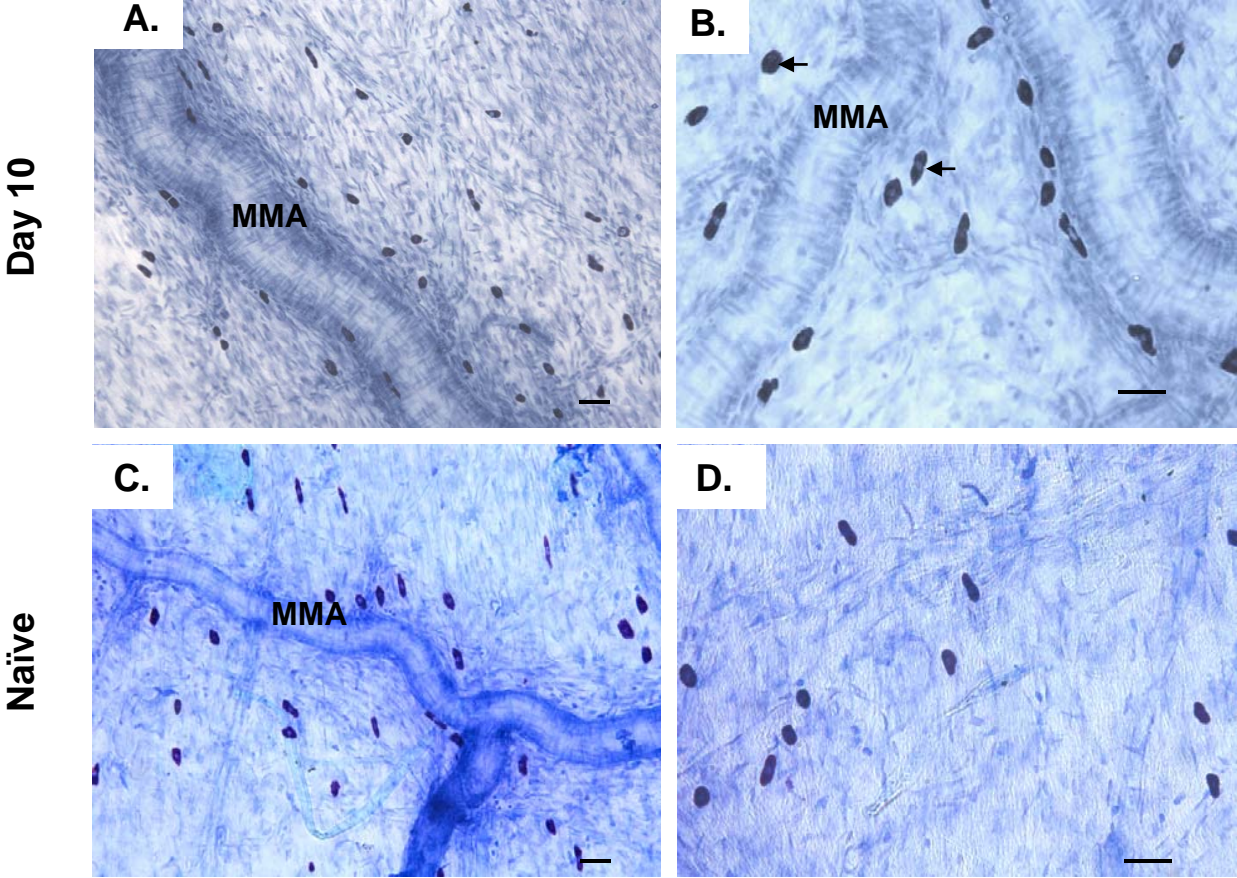

Supplement: supp_91339.2008_figS1.pdf [file supp_91339.2008_figS1.pdf]

## Supplementary Figure 2

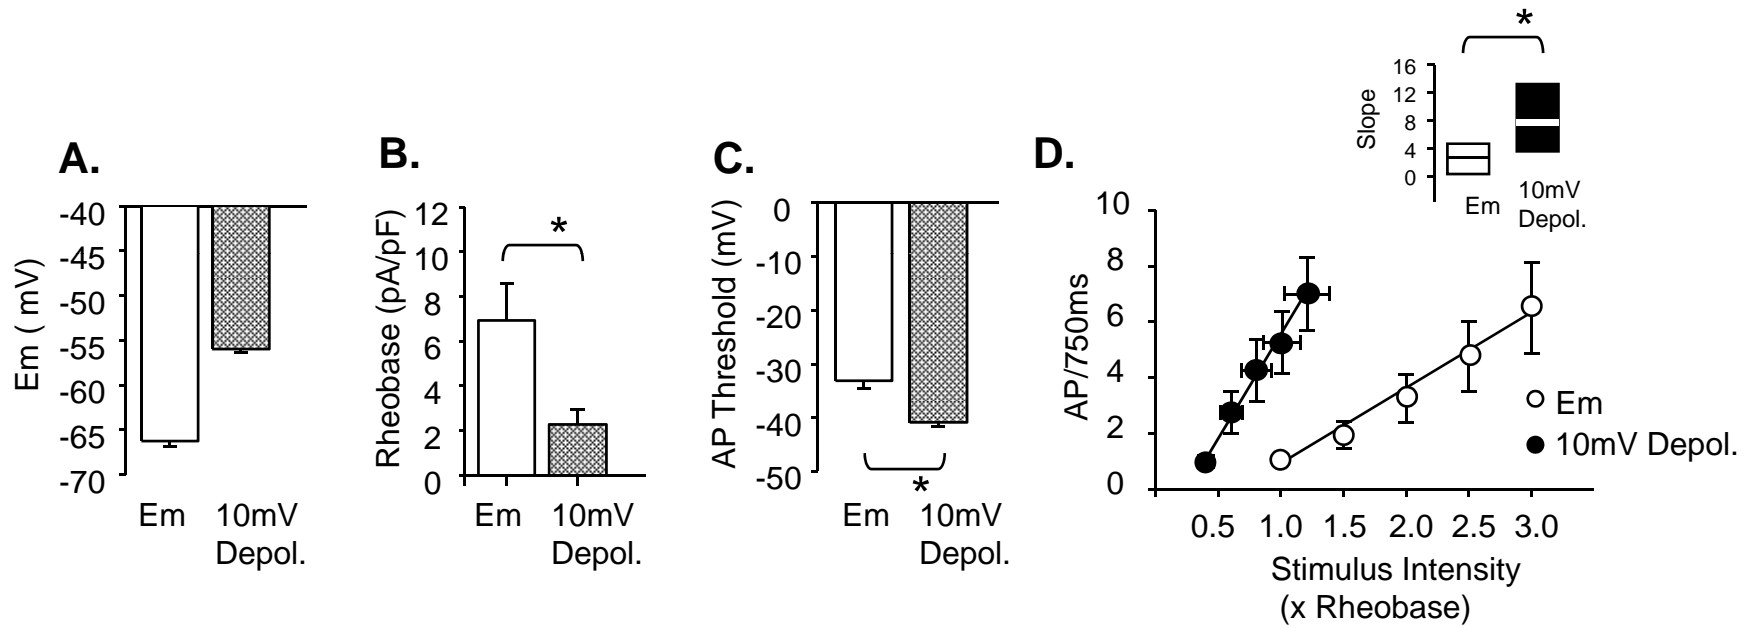

Supplement: supp_91339.2008_figS2.pdf [file supp_91339.2008_figS2.pdf]
